# Supplementary material for: Are female children more vulnerable to the long-term effects of maternal depression during pregnancy?
Source: PubMed Central journal article supplement (PMC4650986; doi:10.1016/j.jad.2015.09.039), 2016-01-01
Supplement: mmc1.pdf [file mmc1.pdf]

Supplementary tables

Complete cases CIS-R

|                                                                                          | Odds ratio for a diagnosis of depression in girls (non-imputed data) | Odds ratio for a diagnosis of depression in boys (non-imputed data) | Interaction with gender (non-imputed data) |
|------------------------------------------------------------------------------------------|----------------------------------------------------------------------|---------------------------------------------------------------------|--------------------------------------------|
| Number of participants                                                                   | 1904                                                                 | 1517                                                                | Total n = 3421                             |
| Antenatal depression in the mother (average score >12 as compared to average score <=12) | 1.67 (95% c.i. 1.07 – 2.59, p value 0.02)                            | 0.97 (95% c.i. 0.41 – 2.28, p value 0.94)                           | P value 0.08                               |
| Postnatal depression in the mother average score >12 as compared to average score <=12)  | 1.50 (95% c.i. 0.87 – 2.61, p value 0.15)                            | 2.54 (95% c.i. 1.22 – 5.30, p value 0.01)                           | P value 0.07                               |

Complete cases MFQ at age 12

|                                    | Odds ratio for high depressed mood in girls using MFQ at 12 | Odds ratio for high depressed mood in boys using MFQ at 12 | Interaction with gender |
|------------------------------------|-------------------------------------------------------------|------------------------------------------------------------|-------------------------|
| Number of participants             | 2622                                                        | 2560                                                       |                         |
| Antenatal depression in the mother | 2.41 (95% c.i. 1.48 – 3.93) P<0.001                         | 2.22 (95% c.i. 1.36 – 3.62) P=0.001                        | P= 0.543                |
|                                    |                                                             |                                                            |                         |
| Postnatal depression in the mother | 2.72 (95% c.i. 1.41 – 5.26) P<0.001                         | 3.01 (95% c. i. 1.55 – 5.86) P<0.001                       | P= 0.639                |
|                                    |                                                             |                                                            |                         |
|                                    |                                                             |                                                            |                         |

Complete cases MFQ at age 18

|                                    | Odds ratio for high depressed mood in girls | Odds ratio for high depressed mood in boys | Interaction with gender |
|------------------------------------|---------------------------------------------|--------------------------------------------|-------------------------|
| Number of participants             | N =1776                                     | N=1381                                     |                         |
| Antenatal depression in the mother | 1.55 (95% c.i. 1.04 – 2.30) P=0.031         | 1.00 (95% c.i. 0.54 – 1.84) P=0.994        | P=0.125                 |
|                                    |                                             |                                            |                         |
| Postnatal depression in the mother | 1.55 (95% c.i. 0.90 – 2.73) P=0.116         | 2.18 (95% c. i. 1.55 – 5.86) P= 0.020      | P= 0.443                |
|                                    |                                             |                                            |                         |
|                                    |                                             |                                            |                         |
